# Supplementary material for: CD44 standard and CD44v10 isoform expression on leukemia cells distinctly influences niche embedding of hematopoietic stem cells
Source: PubMed Central journal article supplement (PMC4022365; doi:10.1186/1756-8722-7-29), 2014-03-31
Supplement: 1756-8722-7-29-S1.pdf [file 1756-8722-7-29-S1.pdf]

**Additional file**

**CD44 standard and CD44v10 isoform expression on leukemia cells distinctly influences niche embedding of hematopoietic stem cells**

Ulrike Erb<sup>1</sup>, Amelie Pajip Megaptche<sup>1</sup>, Xiaoyu Gu<sup>1</sup>, Markus W. Buehler<sup>2</sup>, Margot Zöller<sup>1</sup>

<sup>1</sup>Department of Tumor Cell Biology, University Hospital of Surgery, <sup>2</sup>University Hospital of Surgery, Heidelberg, Germany

**Table 1**

Table 1A

**Antibodies**

| <b>Antibody</b>            | <b>species</b> | <b>supplier</b>              |
|----------------------------|----------------|------------------------------|
| Akt / p-Akt                | rabbit         | BD <sup>1</sup> , HD, G      |
| BAD / p-BAD                | rabbit         | BD, HD, G                    |
| BAX                        | rabbit         | BD, HD, G                    |
| Bcl2                       | rabbit         | BD, HD, G                    |
| BclXl                      | rabbit         | BD, HD, G                    |
| β-catenin                  | rabbit         | BD, HD, G                    |
| bFGF                       | mouse          | BD, HD, G                    |
| act.Caspase3               | rabbit         | BD, HD, G                    |
| Caspase 8                  | rabbit         | BD, HD, G                    |
| cleaved Caspase9           | rabbit         | Cell Signaling, Frankfurt, G |
| CCL5 (Rantes)              | rabbit         | Biotrend, Cologne, G         |
| CCR4                       | rabbit         | R&D, Wiesbaden, G            |
| CCR9                       | rat            | R&D, Wiesbaden, G            |
| CD9                        | rat            | BD, HD, G                    |
| CD11b (YBM6.610)           | rat            | EACC <sup>2</sup>            |
| CD14                       | rat            | BD, HD, G                    |
| CD16                       | rat            | BD, HD, G                    |
| CD32 (2.4G2)               | rat            | EACC                         |
| CD34                       | rat            | BD, HD, G                    |
| CD44 (IM7)                 | rat            | EACC                         |
| CD44v10 (K926)             | rat            | [31]                         |
| CD45R (B220)               | rat            | EACC                         |
| CD54 (YN171.7.4)           | rat            | EACC                         |
| CD63                       | rabbit         | SC <sup>3</sup> , HD, G      |
| CD80                       | rat            | BD, HD, G                    |
| CD81                       | rat            | BD, HD, G                    |
| CD86                       | rat            | BD, HD, G                    |
| CD90 (YTS154)              | rat            | EACC                         |
| CD105                      | rat            | BD, HD, G                    |
| CD106                      | rat            | BD, HD, G                    |
| CD117                      | rat            | BD, HD, G                    |
| CD135                      | rabbit         | SC, HD, G                    |
| c-myc (9E10)               | mouse          | EACC                         |
| CXCL10 (IP10)              | rabbit         | Biotrend, Cologne, G         |
| CXCL12 (SDF1)              | rabbit         | SC, HD, G                    |
| CXCR3 (CD182, IP10-R)      | rat            | SC, HD, G                    |
| CXCR4 (CD184, SDF1-R)      | rabbit         | SC, HD, G                    |
| cyclinD1                   | rabbit         | Dianova, Hamburg, G          |
| Gr1                        | rat            | BD, HD, G                    |
| H-2 <sup>b</sup> (K7-65)   | mouse          | ref.87                       |
| H-2 <sup>d</sup> (K9-18)   | mouse          | ref.87                       |
| HSP70                      | rabbit         | BD, HD, G                    |
| I-A <sup>b</sup> (K25-137) | mouse          | ref.87                       |
| IFNγ-R (CD119)             | rat            | BD, HD, G                    |
| IgM                        | rat            | BD, HD, G                    |
| IL6                        | rat            | BD, HD, G                    |
| IL6Ra (CD126)              | rat            | BD, HD, G                    |
| IL10R (CD210)              | rat            | Biollegend, Uithoorn,NE      |
| Lef                        | rabbit         | SC, HD, G                    |
| MFGE8                      | rabbit         | SC, HD, G                    |

Table 1A continued

|                |         |                   |
|----------------|---------|-------------------|
| NK (PK136)     | rat     | EACC              |
| OPN            | rabbit  | R&D, Wiesbaden, G |
| PI3K / pPI3K   | rabbit  | SC, HD, G         |
| SCA1 (E13.161) | rat     | EACC              |
| Ter119         | rat     | BD, HD, G         |
| TNF $\alpha$   | hamster | BD, HD, G         |
| TNFR1 (CD120a) | hamster | BD, HD, G         |
| TNFR2 (CD120b) | hamster | BD, HD, G         |

Table 1B

**Matrix proteins, Cytokines / Chemokines, Chemicals**

| <b>Substance</b>         | <b>Supplier</b>                 | <b>Dose</b>     |
|--------------------------|---------------------------------|-----------------|
| AnnexinV-APC, -FITC, -PE | BD, HD, G                       | variable        |
| BSA                      | Sigma, Munich, G                | 100 $\mu$ g/ml  |
| Hyaluronic acid          | Sigma, Munich, G                | 100 $\mu$ g/ml  |
| IL2                      | IT <sup>4</sup> , Friesoythe, G | 3 $\mu$ g/ml    |
| OPN                      | IT, Friesoythe, G               | 2 $\mu$ g/ml    |
| mitomycin                | Sigma, Munich, G                | 100 $\mu$ g/ml  |
| CFSE                     | Invitrogen, Karlsruhe, G        | 0.5-2 $\mu$ M   |
| cisplatin                | Sigma, Munich, G                | 1-40 $\mu$ g/ml |
| PI                       | IT, Friesoythe, G               | 0.08ng/ml       |

<sup>1</sup> BD: Becton Dickinson, Heidelberg, German, <sup>2</sup> EACC: European Animal Cell Culture Collection, Porton Down, UK, <sup>3</sup> SC: Santa Cruz, Heidelberg, Germany, <sup>4</sup> Immunotools, Friesoythe, Germany
